# Supplementary material for: Development of zeolite-A incorporated PVA/CS nanofibrous composite membranes using the electrospinning technique for pervaporation dehydration of water/tert-butanol
Source: Royal Society of Chemistry journal article supplement (doi:10.1039/d0nj04963h), 2021-01-01
Supplement: d0nj04963h9.pdf [file d0nj04963h9.pdf]

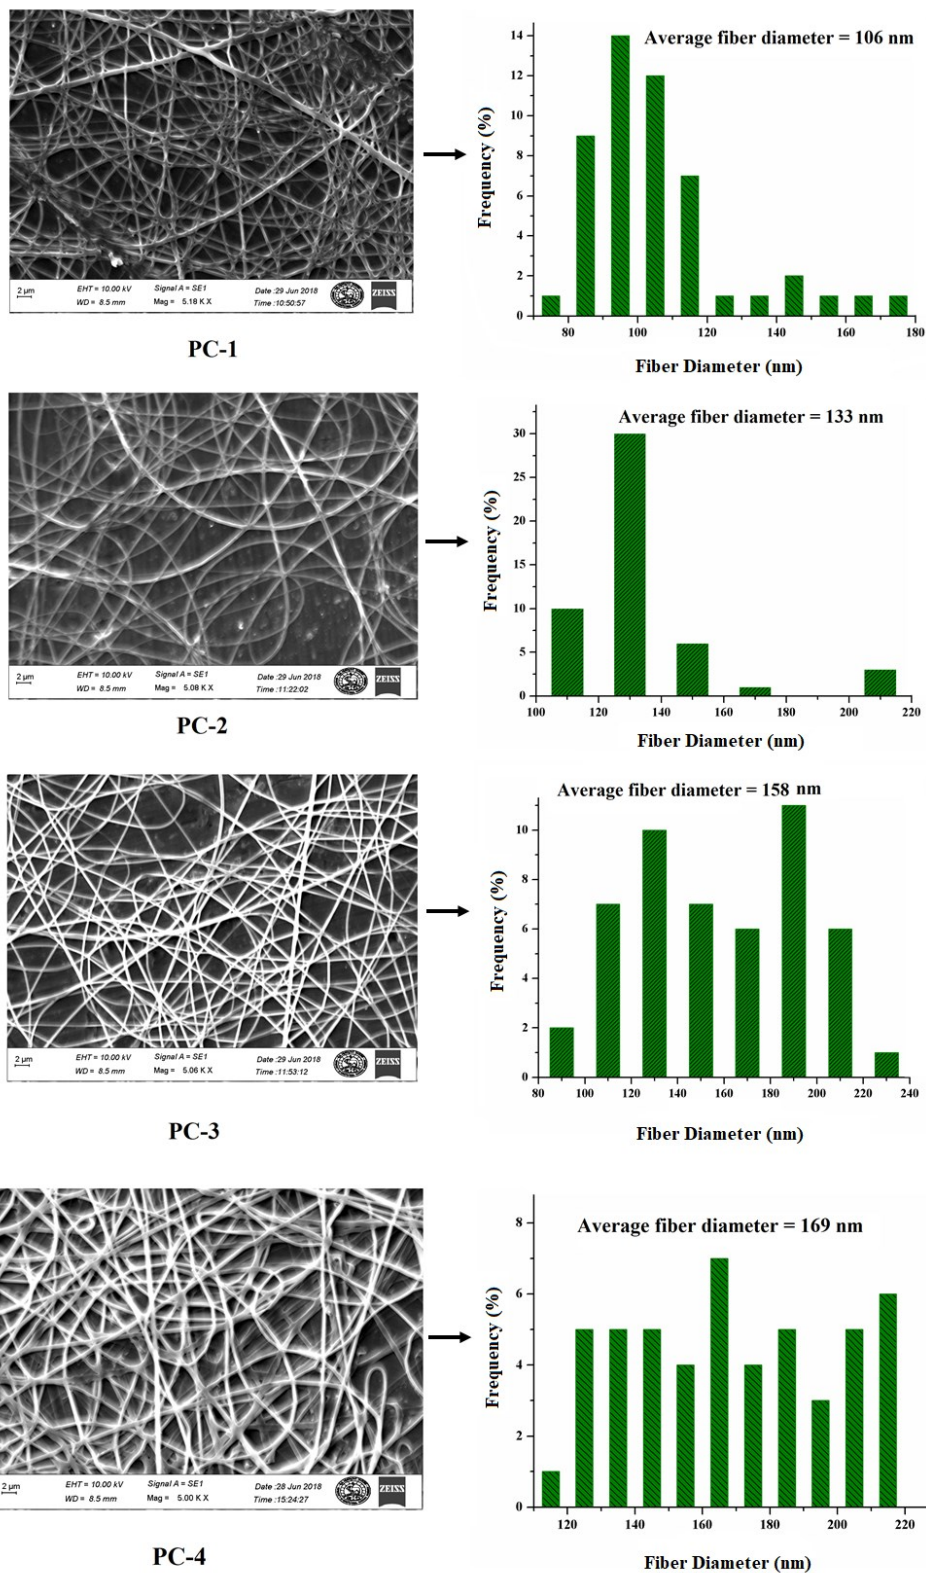

**Fig. S1.** The SEM micrographs of nanofibres with different volume ratios of PVA/CS: a) PC-1 (9:1); b) PC-2 (8:2); c) PC-3 (7:3) and d) PC-4 (6:4).

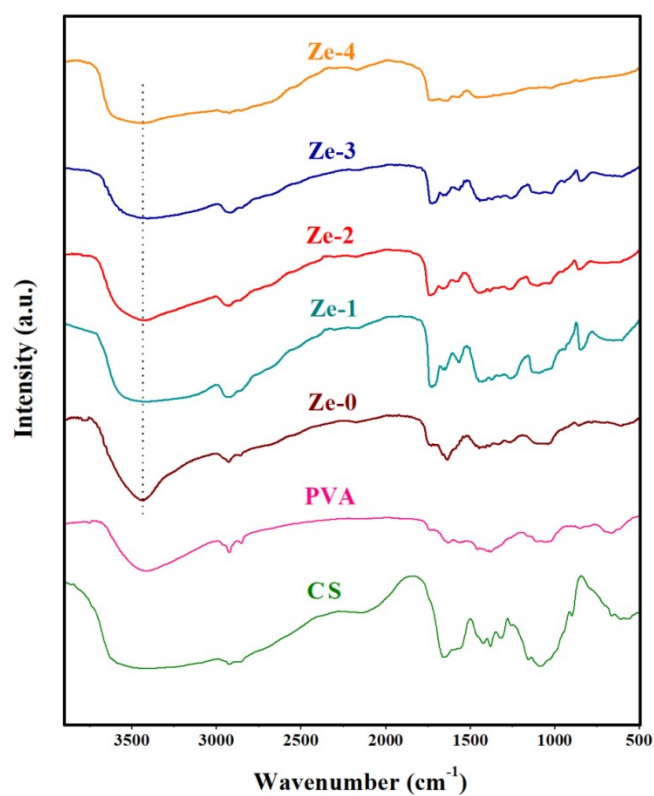

**Fig. S2.** The FTIR spectra of pure CS and PVA, and its zeolite-A nanofibrous composite membranes.

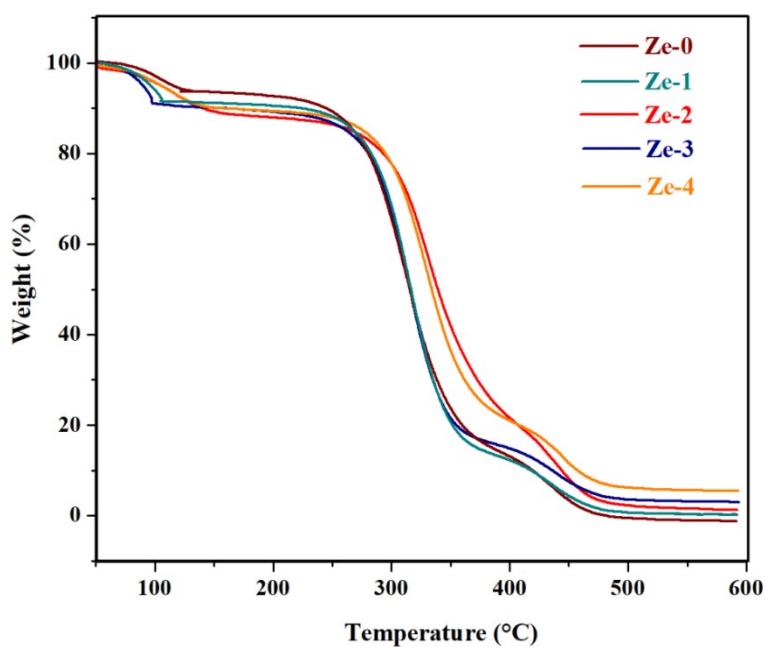

**Fig. S3.** The TGA thermograms of composite nanofibrous membranes: Ze-0, Ze-1, Ze-2, Ze-3 and Ze-4.

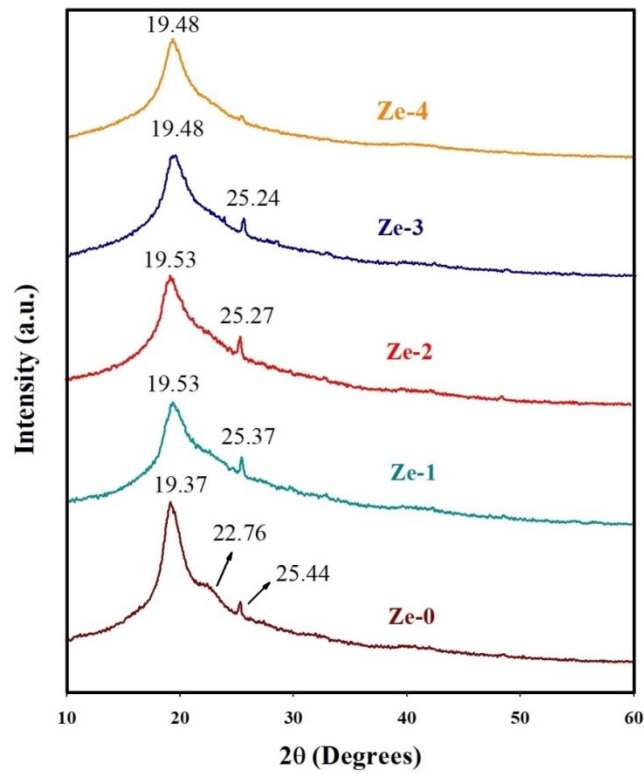

Fig.S4. The WAXD patterns of nanofibrous composite membranes: Ze-0, Ze-1, Ze-2, Ze-3 and Ze-4.

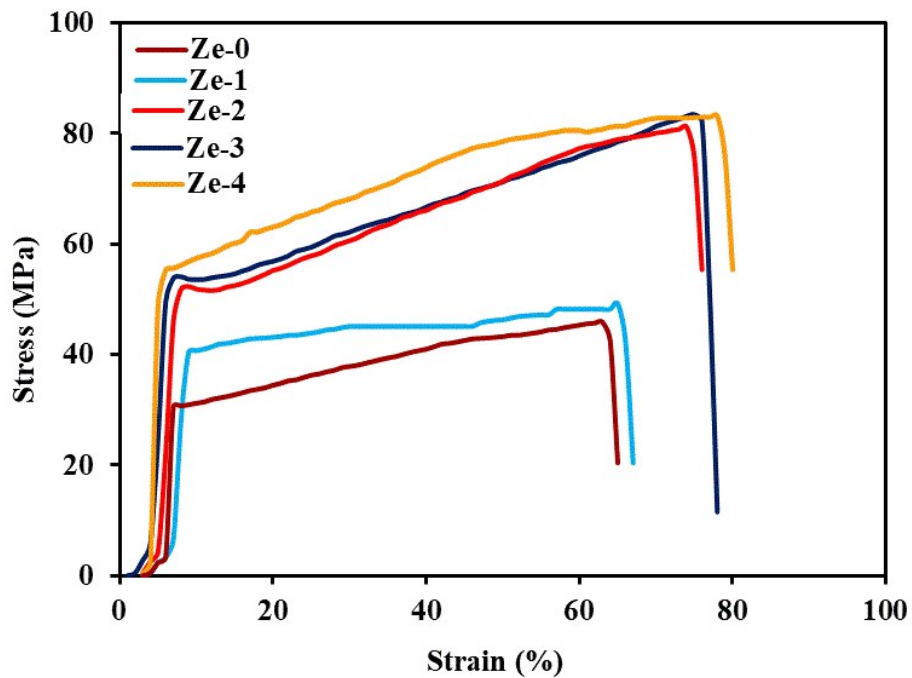

Fig. S5. The stress-strain curves of the composite nanofibrous membranes.

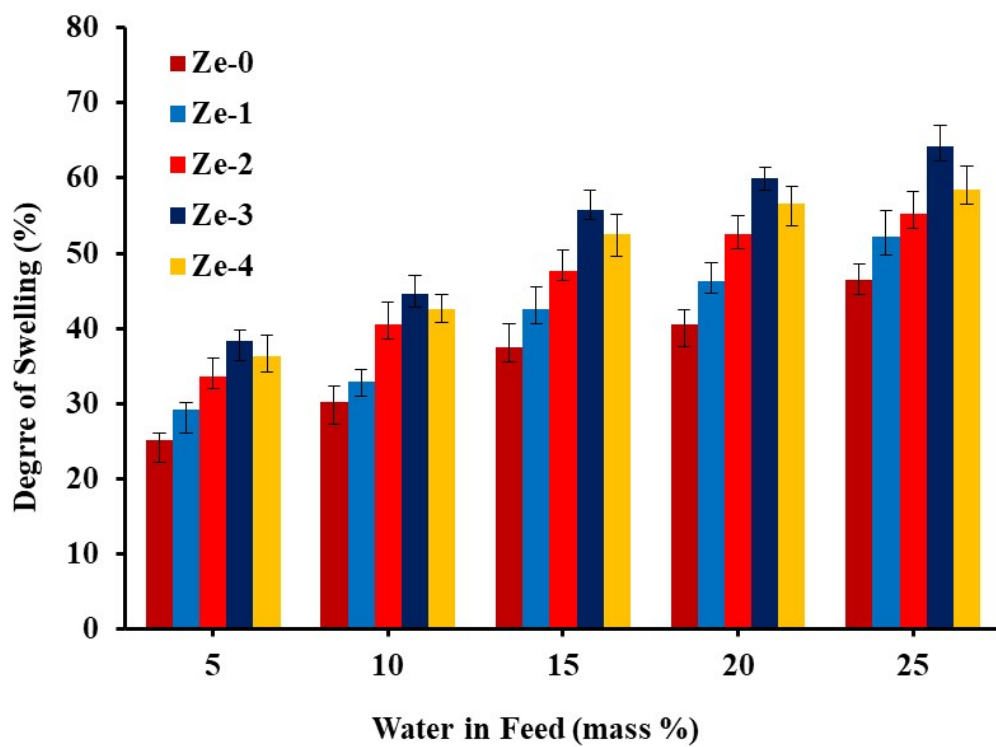

**Fig. S6.** The degree of swelling for PVA/CS and zeolite-A incorporated composite nanofibrous membranes in different mass% of water in the feed.

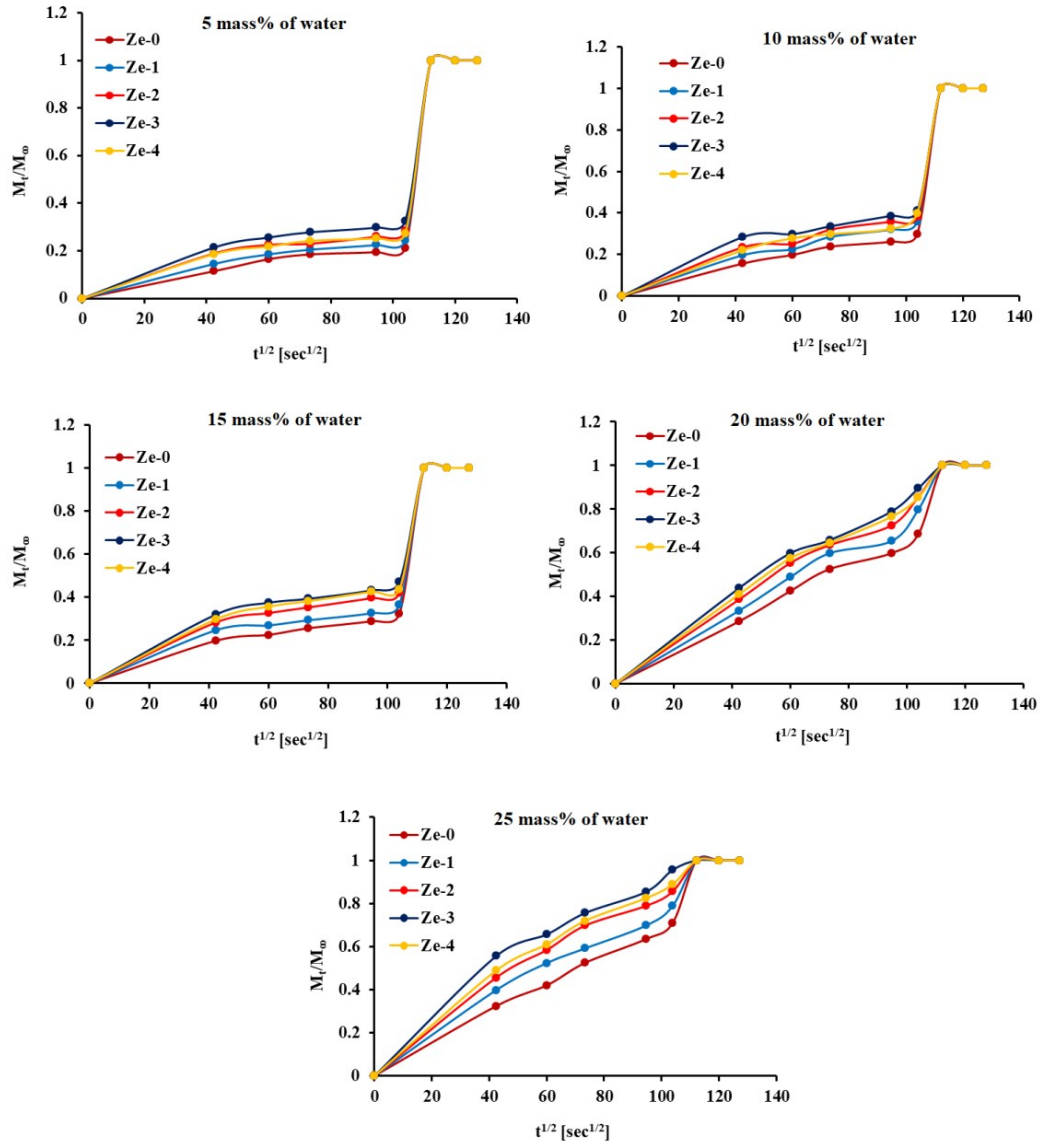

**Fig. S7.** The sorption curves of composite nanofibrous membranes.
