# Supplementary figures and images for: Development of zeolite-A incorporated PVA/CS nanofibrous composite membranes using the electrospinning technique for pervaporation dehydration of water/tert-butanol
Source: Royal Society of Chemistry journal article supplement (doi:10.1039/d0nj04963h), 2021-01-01

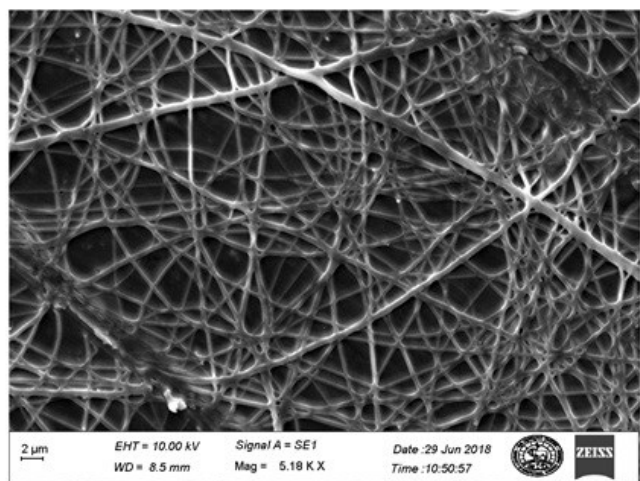

PC-1

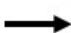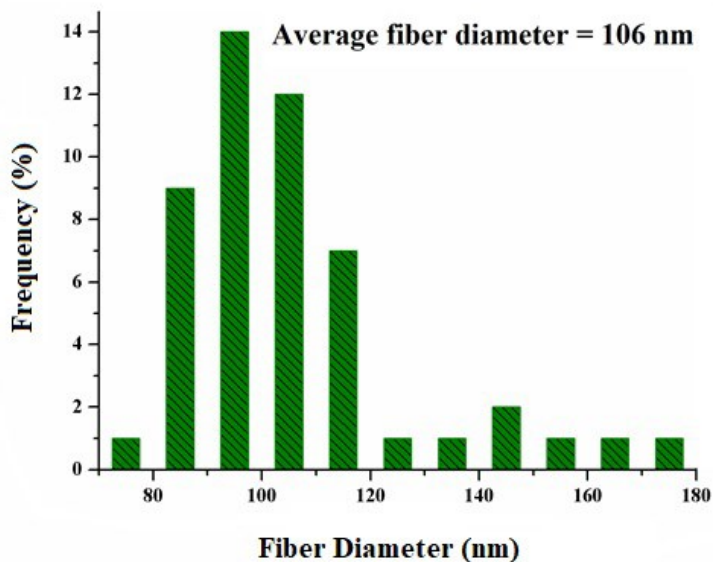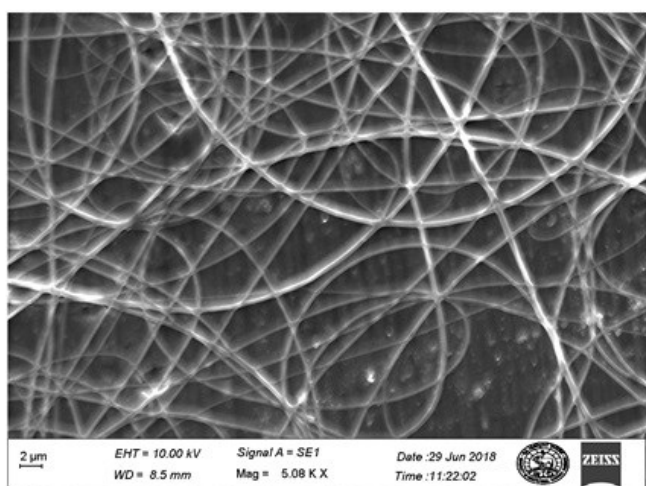

PC-2

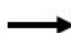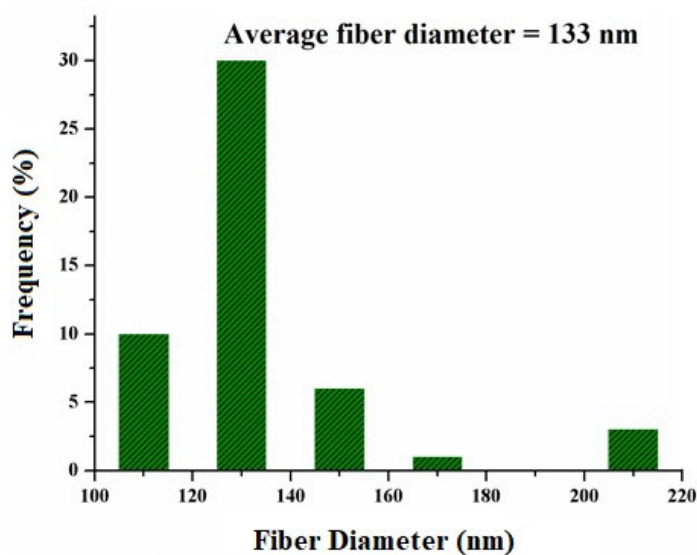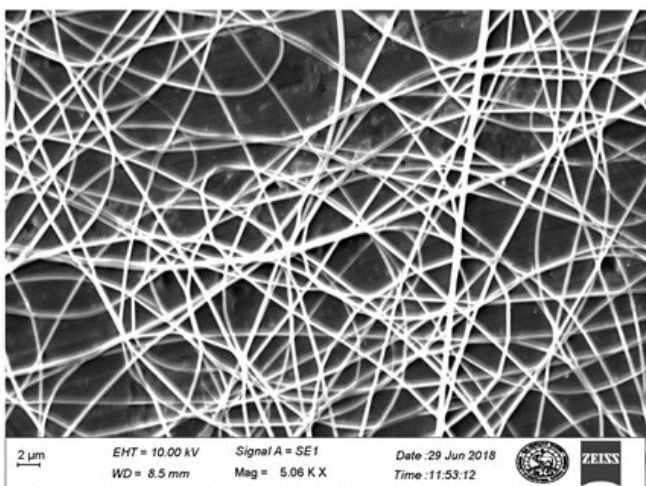

PC-3

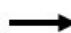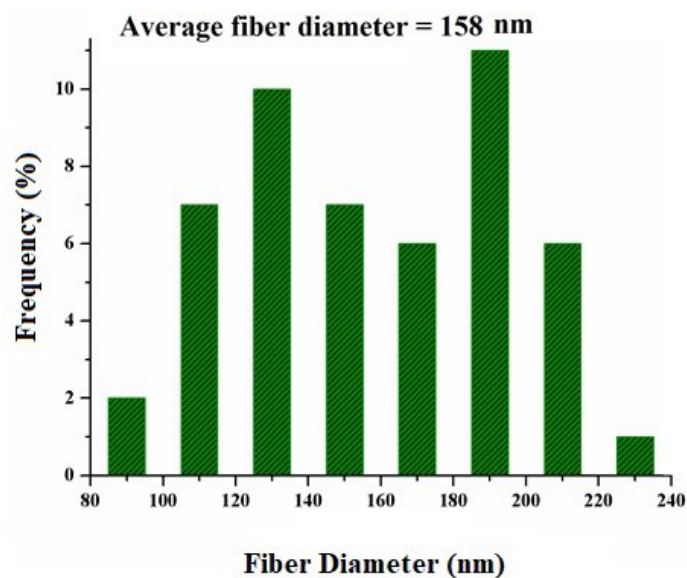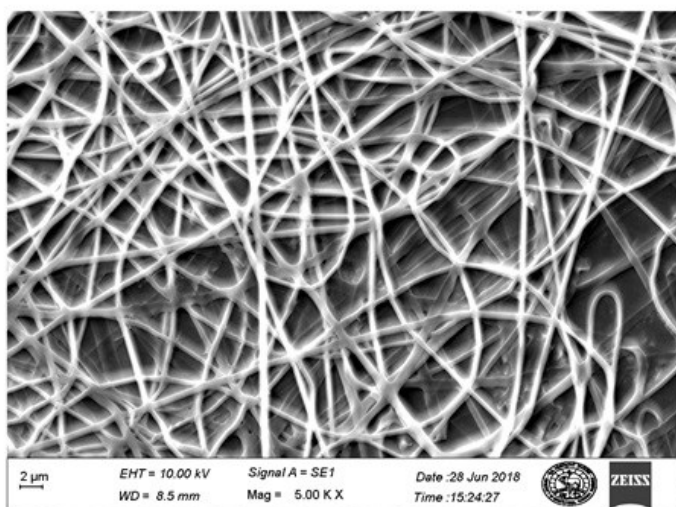

PC-4

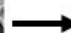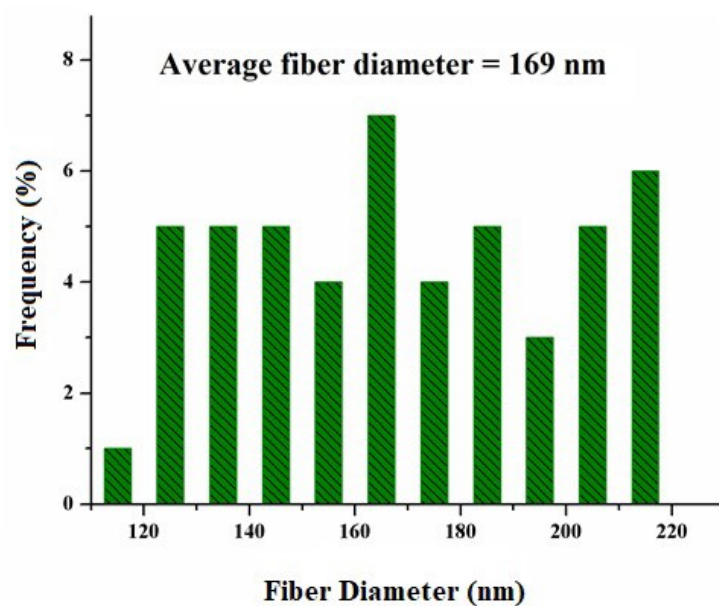

Supplement: d0nj04963h2.pdf [file d0nj04963h2.pdf]

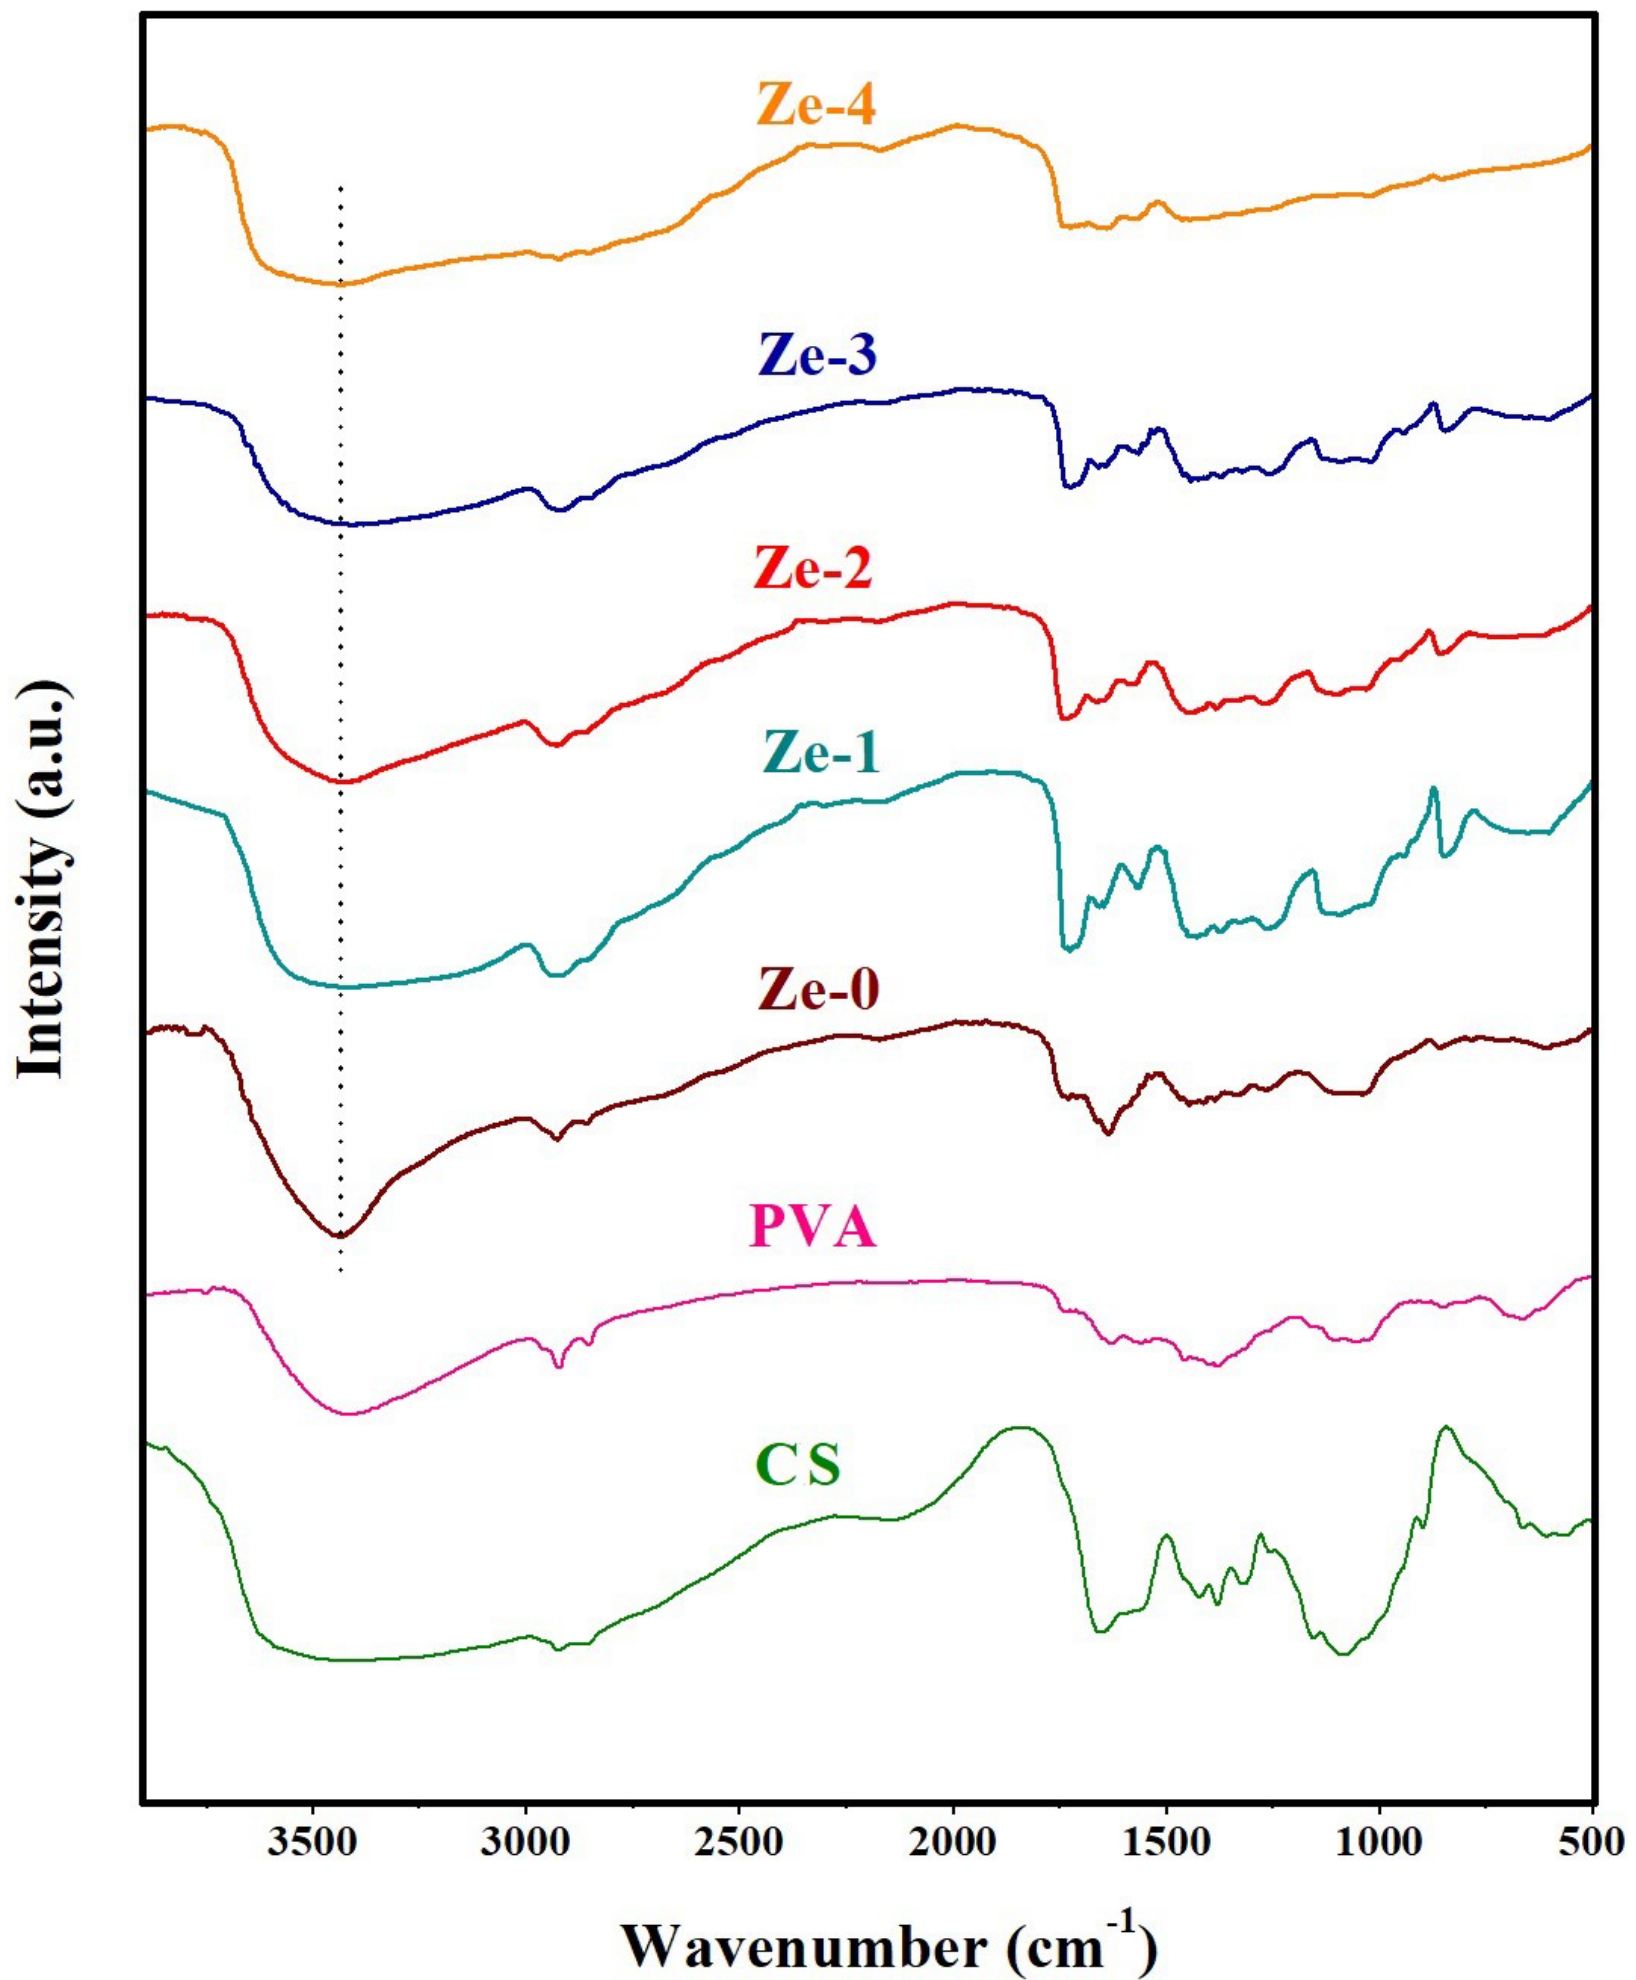

Supplement: d0nj04963h3.pdf [file d0nj04963h3.pdf]

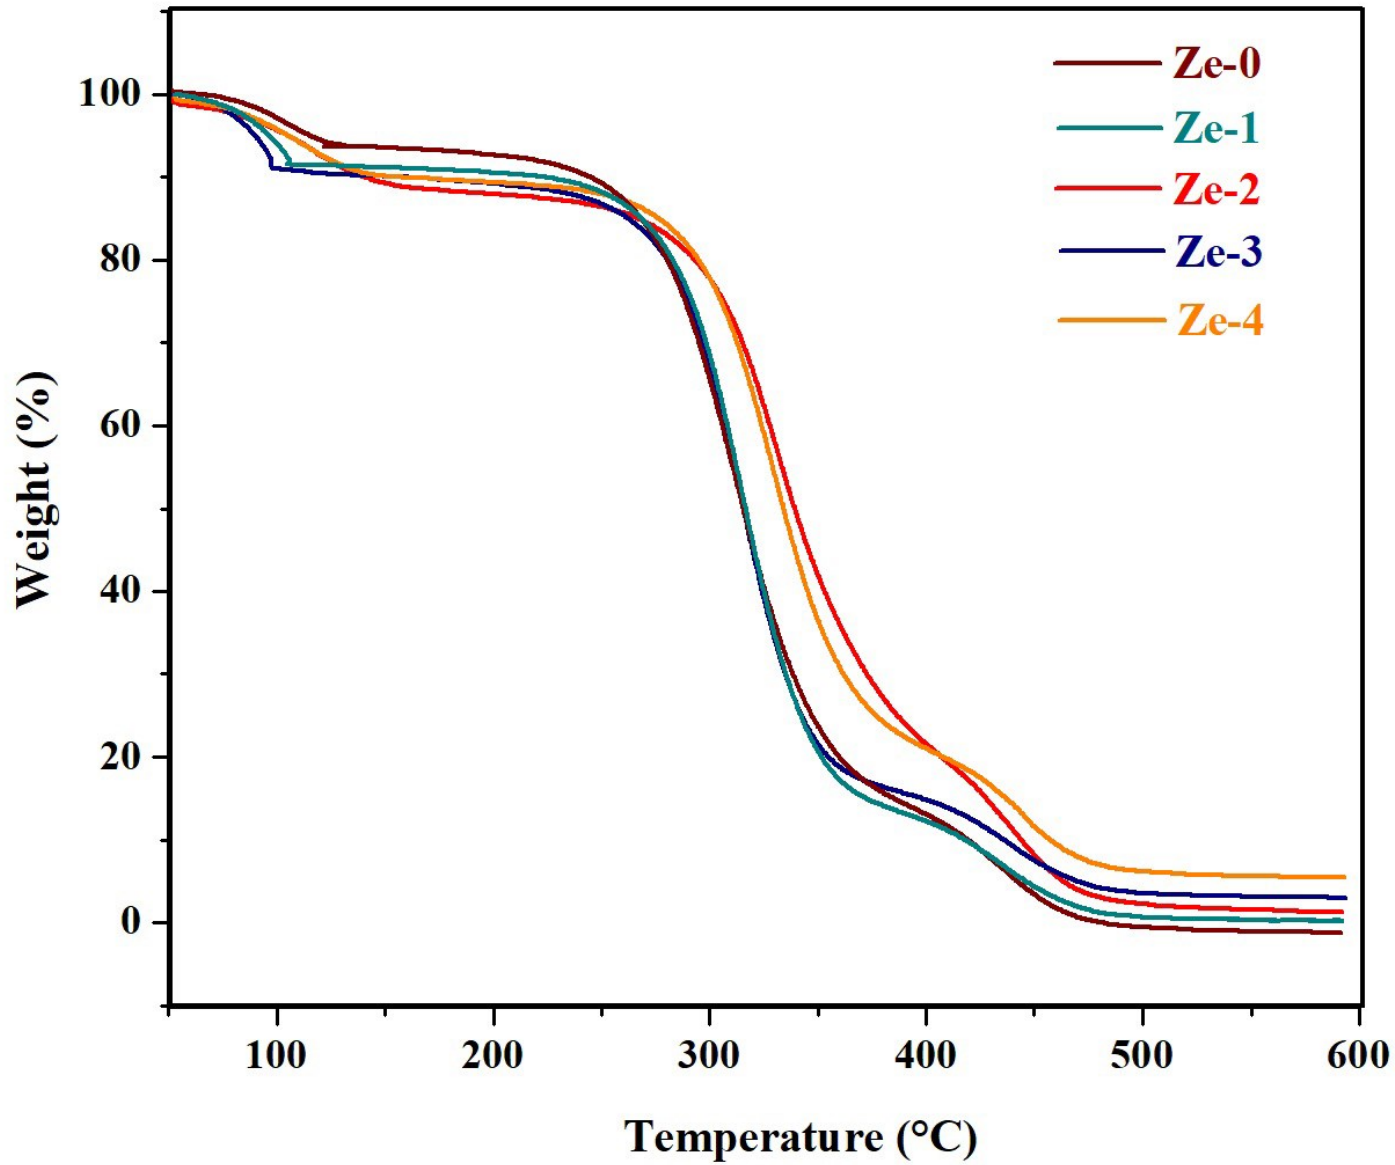

Supplement: d0nj04963h4.pdf [file d0nj04963h4.pdf]

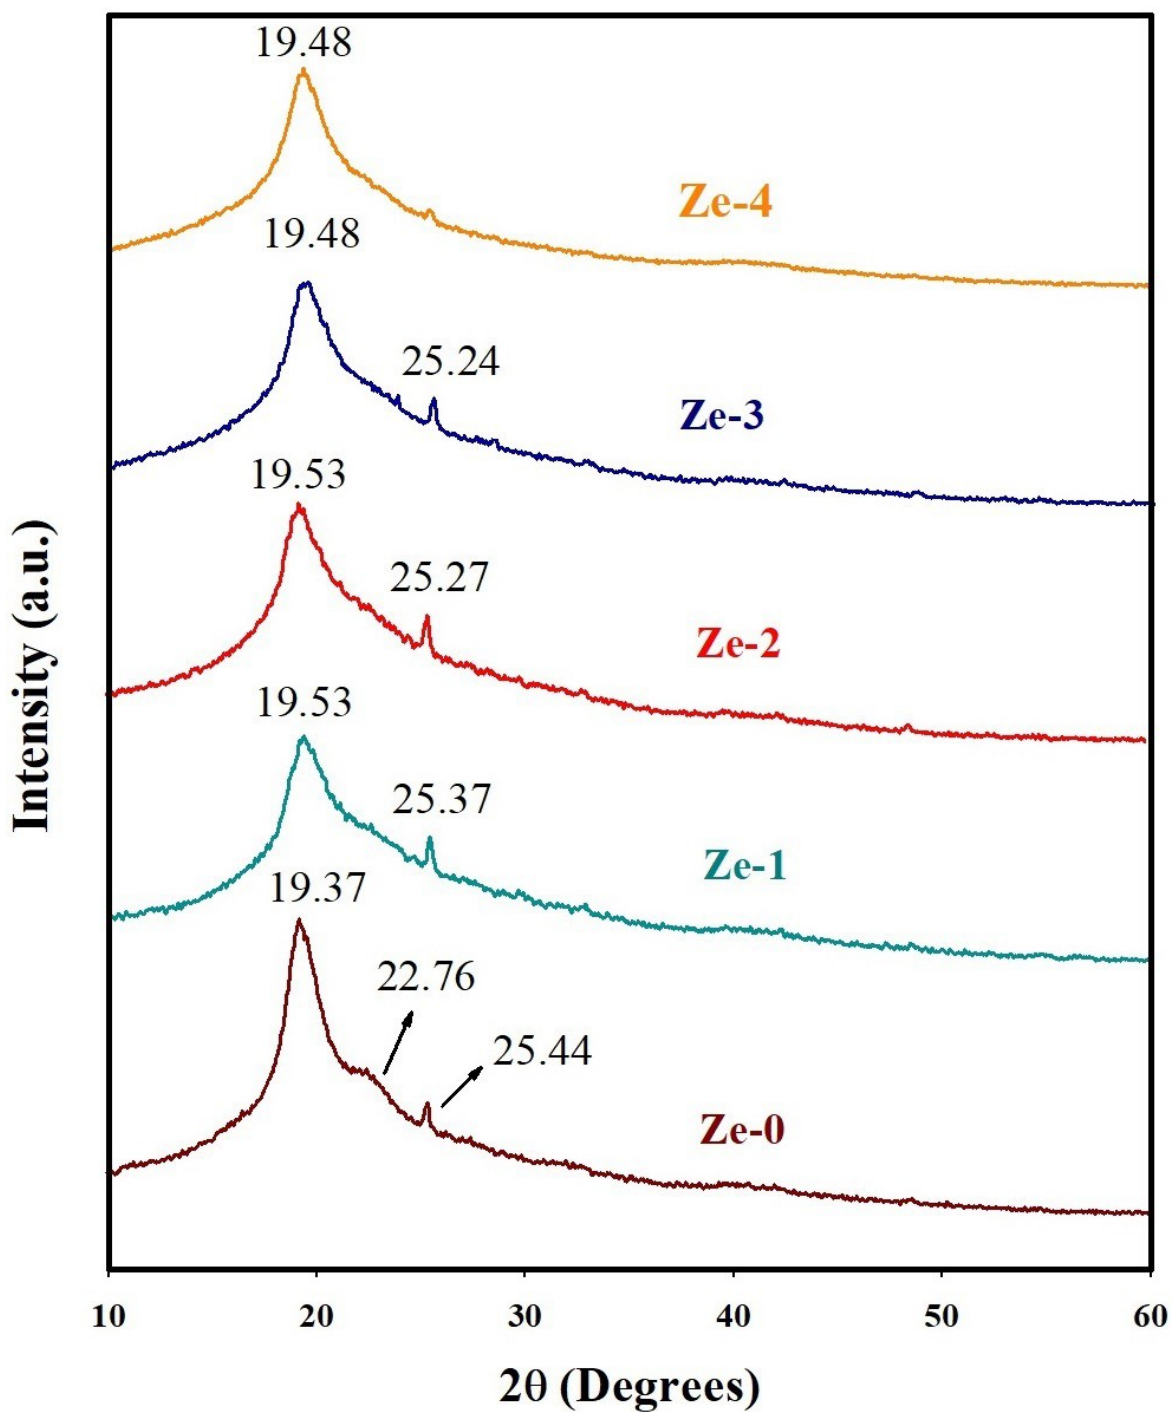

Supplement: d0nj04963h5.pdf [file d0nj04963h5.pdf]

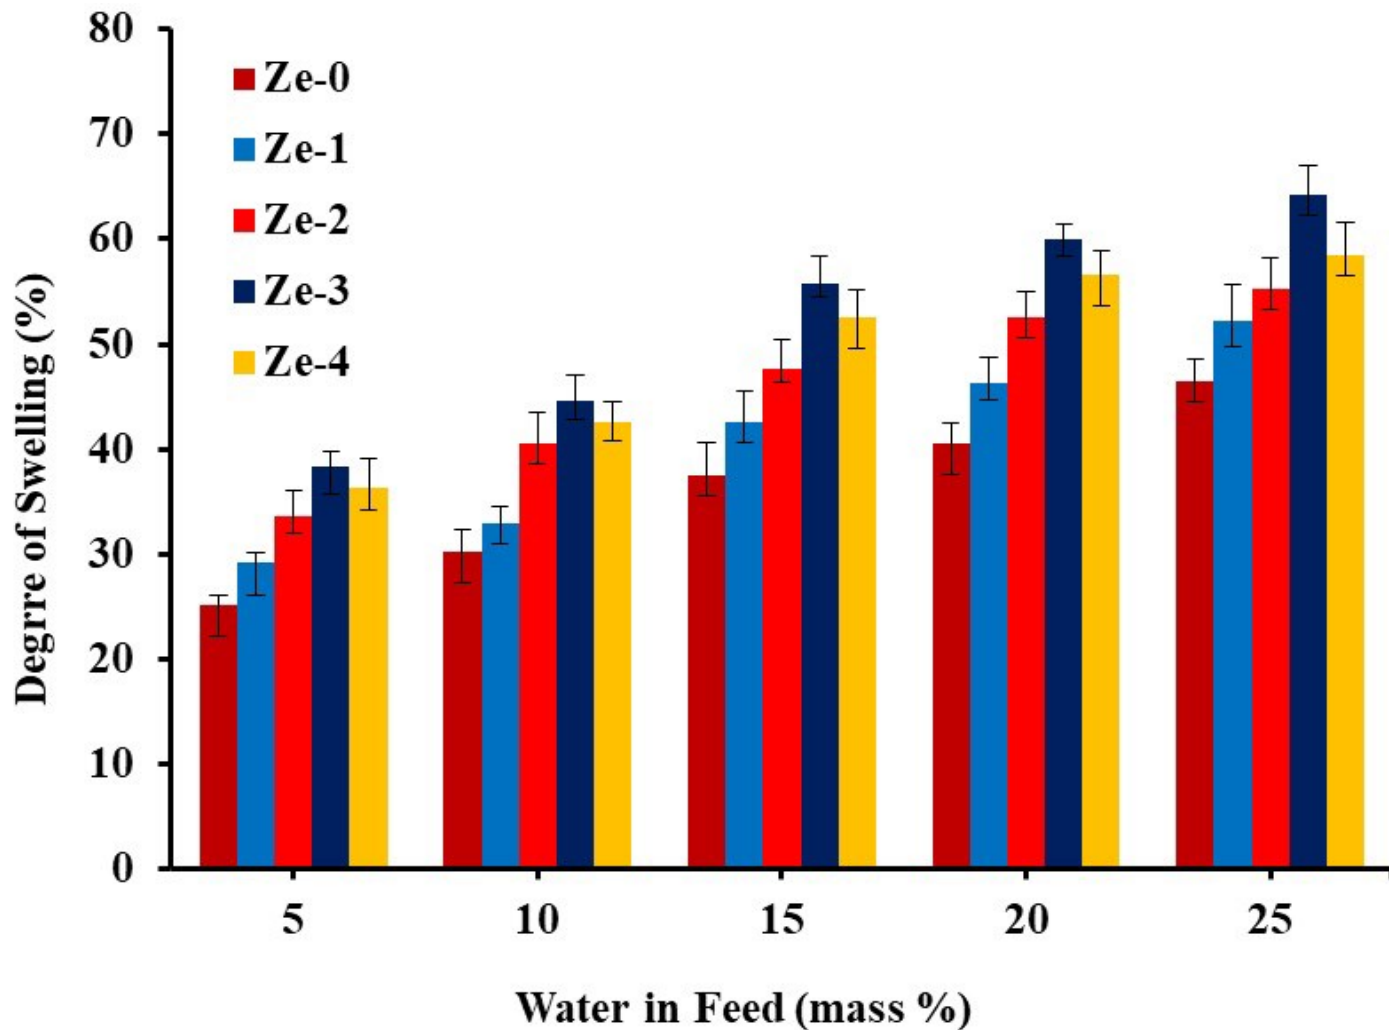

Supplement: d0nj04963h7.pdf [file d0nj04963h7.pdf]

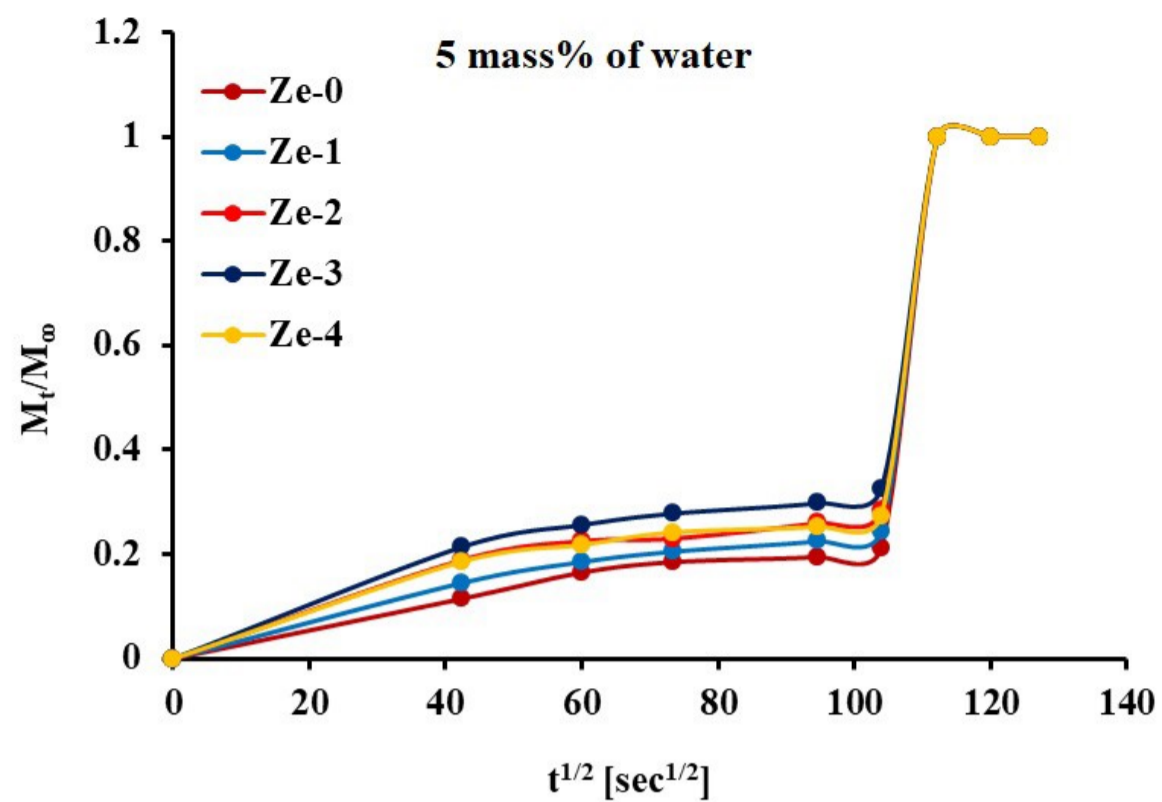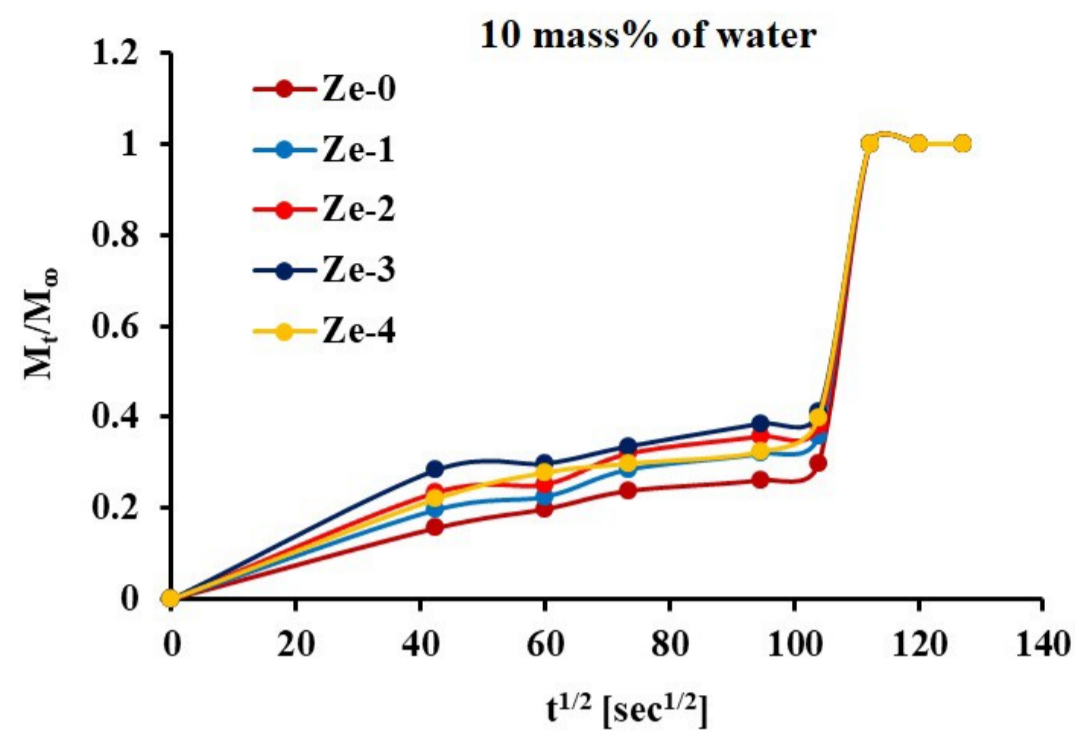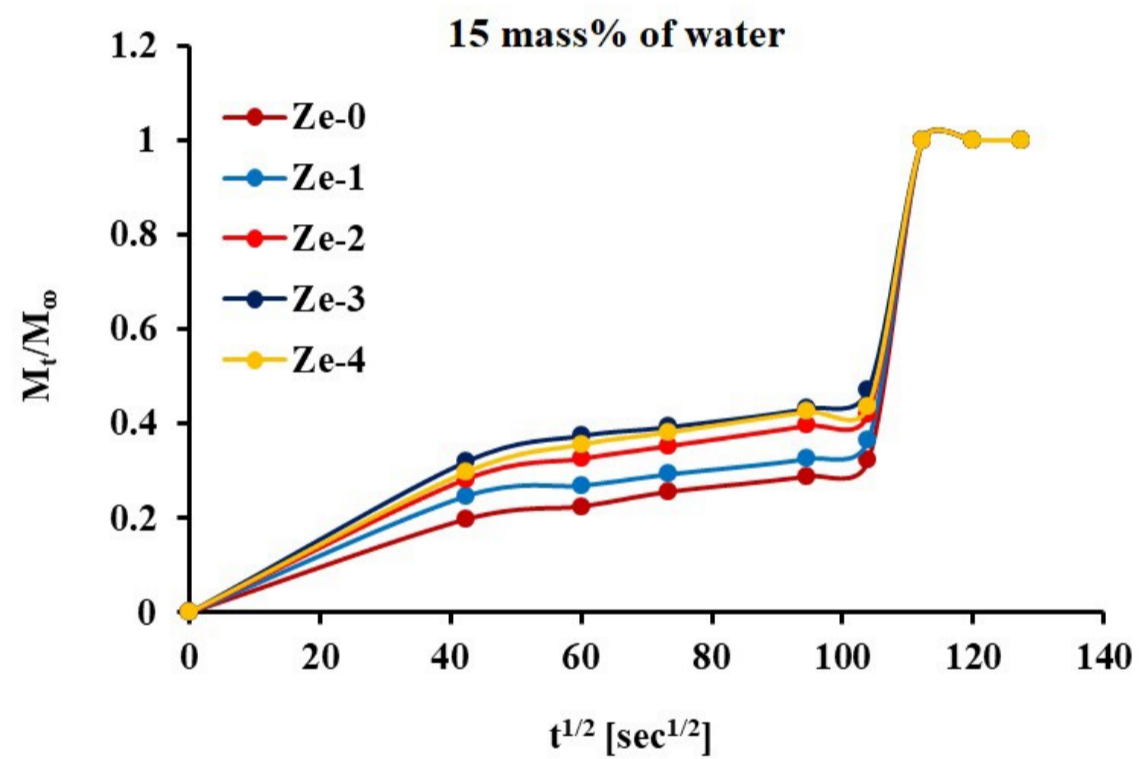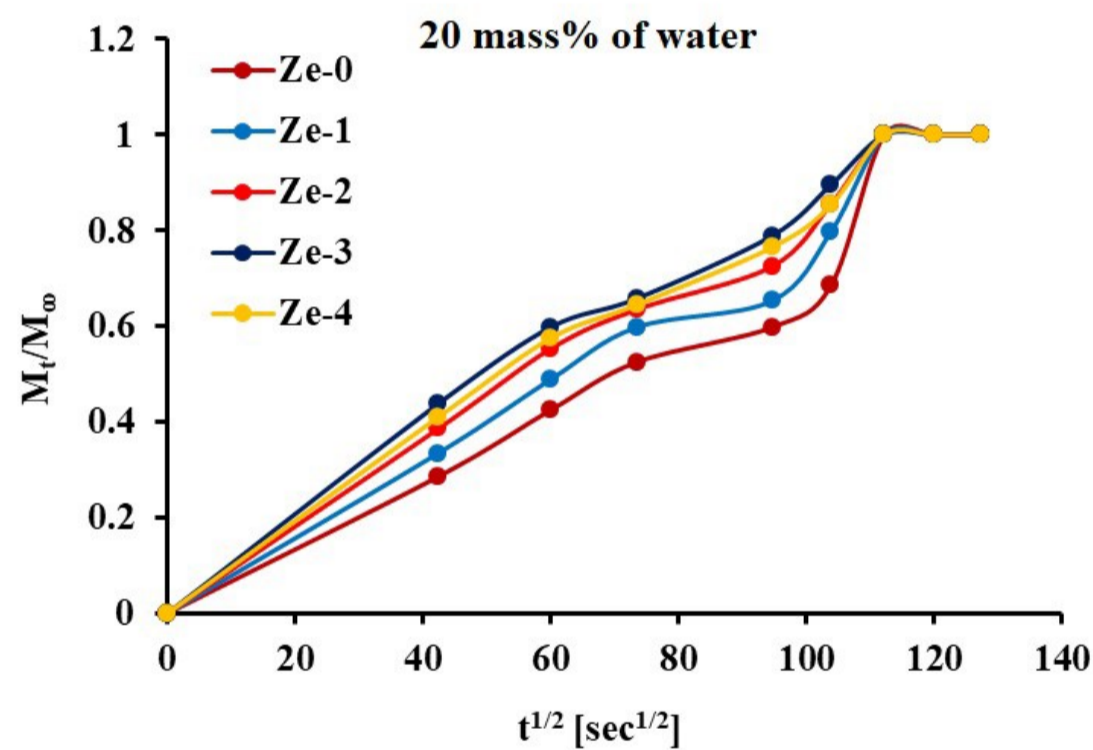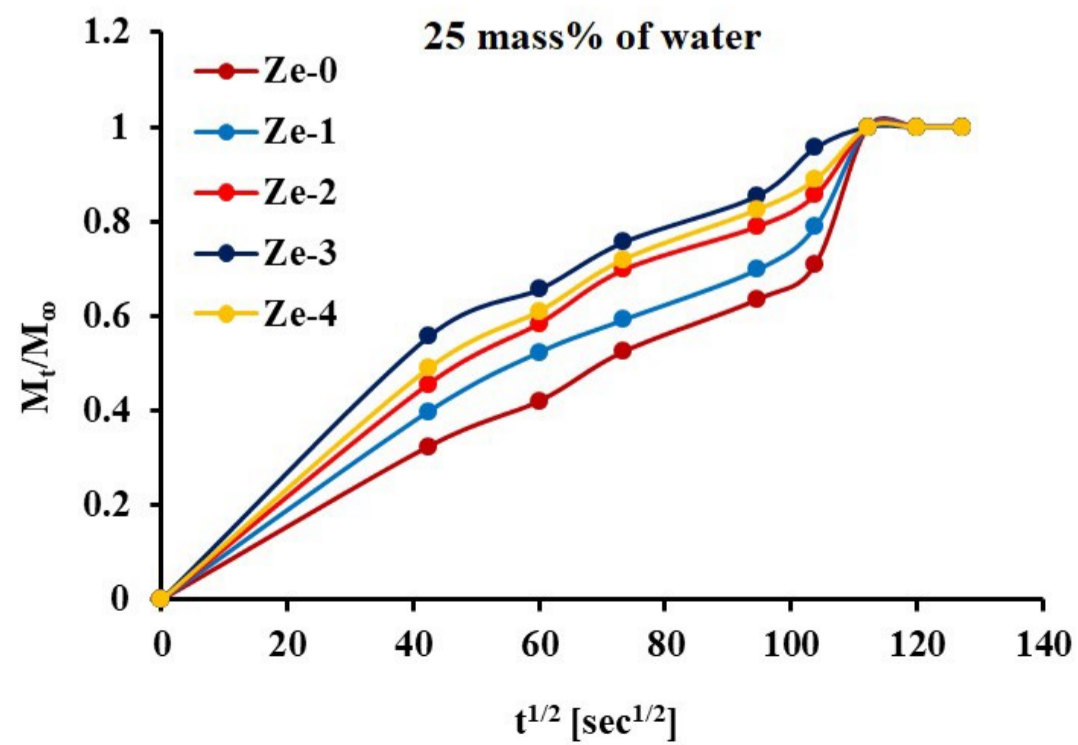

Supplement: d0nj04963h8.pdf [file d0nj04963h8.pdf]
